# Supplementary material for: Stakeholder Views on Active Cascade Screening for Familial Hypercholesterolemia
Source: PubMed Central journal article supplement (PMC6163326; doi:10.3390/healthcare6030108), 2018-08-31
Supplement: healthcare-06-00108-s001.pdf [file healthcare-06-00108-s001.pdf]

## Table S1

### Code list Transcripts interviews 'Stakeholder views on active cascade screening for familial hypercholesterolemia 2018'

|                            |         |                                                                                                                                                                                         |
|----------------------------|---------|-----------------------------------------------------------------------------------------------------------------------------------------------------------------------------------------|
| reason screening           |         | treatment/prevention                                                                                                                                                                    |
| end of screening programme |         | liberal ideas, stakeholders organise themselves<br>cost<br>should have gone on<br>not of these days                                                                                     |
| active approach            | con     | paternalistic<br>right not to know<br>few complaints about transgressing right not to know/positive reactions<br>autonomy to inform the family<br>burden (not) informing family members |
|                            | pro     | support for patient informing family members<br>effective<br>cost effectiveness                                                                                                         |
| new system                 | LEEFH   | LEEFH centers characterised by regional differences, own budgets, own means and eagerness<br>reduction in finding patients or family members<br>lack of awareness, public, GPs          |
|                            | role GP | few patients per practice, lack of knowledge,<br>unwilling to refer<br>lack of knowledge, wrong advice<br>make GP aware                                                                 |
|                            | nurse   | should do the cascade screening                                                                                                                                                         |

|                            |                   |                                                                                                                                                                                                                                                                                                                                                                                                      |
|----------------------------|-------------------|------------------------------------------------------------------------------------------------------------------------------------------------------------------------------------------------------------------------------------------------------------------------------------------------------------------------------------------------------------------------------------------------------|
|                            | RIVM              | regular care is not fit for FH care<br>reports, letter sent by patient organisation, discussion Medisch Contact                                                                                                                                                                                                                                                                                      |
|                            | clinical genetics | FH is relatively simple genetic disease, easy treatment, no complex knowledge or counseling<br>clinical genetics can coordinate/support/train cascade testing, without doing it itself<br>costly<br>Clinical genetics is focused on diagnosis not on saving lives through prevention<br>new guidelines will be made<br>family meetings can be organised, clinical geneticist can invite              |
|                            | government        | it is a task of the government that people know about FH<br>RIVM should organise national cascade screening programme for hereditary diseases as FH                                                                                                                                                                                                                                                  |
|                            | awareness         | Should stimulate awareness (via information campaign)<br>autonomy: patient should decide if he wants to inform family members<br>cannot inform family members without consent index, confidentiality<br>treating physician should inform patient<br>direct contacting may be problematic in light of privacy regulation<br>failing to inform family members is also problematic, people can reproach |
| privacy/legal issues       |                   | also in other screening programmes people are selected based on risk                                                                                                                                                                                                                                                                                                                                 |
|                            | future            |                                                                                                                                                                                                                                                                                                                                                                                                      |
| active without home visits |                   | more information to make autonomous decision<br>nurse/genetic field worker<br>family gatherings/family consultations<br>folder, websites<br>stress that family testing can be done at GP so no own risk involved<br>family meeting                                                                                                                                                                   |
| StOEH                      |                   | centralized, no regional connections                                                                                                                                                                                                                                                                                                                                                                 |
| insured care               |                   | patient has to come with a question, you cannot invite people to screen<br>own risk is a barrier<br>separate organisation health care and prevention is problem                                                                                                                                                                                                                                      |

case finding

not all mutations known  
pop up for physician ordering (cholesterol) testing

testing children

cord blood  
test at age 7-8  
importance of genetic testing for children

insurance

no (life) insurance problem if FH is treated

stakeholders

(NHG organisation of) GPs  
  
(NIV Professional organisation) Internal medicine  
cardiologists  
pediatricians  
professional societies clinical genetics  
media television, facebook etc  
Ministry of Health  
ZIN (National Health Care Institute)  
RIVM (National Institute for Public  
Health and the Environment)

funding

lack of funding to improve FH care and/or informing families/awareness

## Supplementary Material S1: Interview Protocol Stakeholder Views

Interview protocol, version April 2017

Stakeholder analysis of the pros and cons of informing healthy individuals on their genome:

*Introduction:*

-Introduce Members of the team

-Refer to the email and give the information letter.

-Give the consent form to sign and ask for consent to tape the interview.

*Background (as discussed in the information letter)*

In recent years, discussion has arisen how to effectively and responsibly use genomic information to prevent chronic disorders such as cancers and cardiovascular diseases. Important in this development is the possibility to offer preventive treatment to family members of identified index patients, such as in case of hereditary cancers and Familial Hypercholesterolemia. In European countries various strategies have been used to approach family members. A project funded by the European Commission (PRECeDI) allows us to conduct an interview study on the

question how actively family members could or should be approached and informed on their genetic risk. To study this question we contact stakeholders in FH care to discuss their views, and the pros and cons of current and alternative approaches.

*Background to the questions:*

In the Netherlands until 2013 an official screening programme for Familial Hypercholesterolemia existed to actively identify index patients. After patients were diagnosed in a very pro-active way their family members were contacted. StOEH invited family members after patient consent, who were visited at home and entire family groups were subsequently informed and tested together. Since the Netherlands has abandoned this approach the number of tested individuals has dropped from several thousands to several hundreds per year.

-What is your current role in FH care or organisation?

We would like to learn more about your views regarding proactive informing and contacting of family members of FH patients as in the time of the screening programme.

-Could you reflect on what would be the pros and cons of a pro-active approach of informing family members?

(Consider from literature: paternalism, forcing to test, cost, organisation, versus uptake, duty to care)

-Do you think the nature of the disorder call for this type of approach?

(Consider from literature: availability of treatment options)

We would like to learn more about your views regarding pro-active informing and contacting of family members of FH patients in the current situation?

How pro-active would you like to be?

-How would you balance the pros and cons as you see them in your specific practice?

-What would be your main concerns in this process?

-What would you consider to be desirable to optimise your current practice?

-What stakeholders do you see or work with in optimising current practices?

(Check views on policy making, collaboration between disciplines, implementation of new technologies)

-What factors can you identify that help or hinder improving current practices in collaborating with these stakeholders?

(Check for **cultural factors** such as norms, views on genetic testing and counselling; and **structural factors** such as funding, referral routines)
